# Supplementary material for: Genomic Characteristics and Evolutionary Analysis of a Rare GI.1 Norovirus Isolate From Beijing, China
Source: Research Square preprint supplement (doi:10.21203/rs.3.rs-888489/v1), 2021-09-20
Supplement: Supplementary file 1 [file d8f35ea0ddb70046cf656eb6.xlsx]

## Sheet: Sheet1
Table S1 Comparison of mutation sites between the ZD strain and MT008453.1 noroviruses
Strain	Site
								ORF1
	33	42	63	92	255	384	525	571	678	969	978	1053	1131	1167	1236	1290
MT008453.1	T	C	G	C	T	T	T	A	C	T	G	T	A	A	A	A
ZD	C	T	A	T	C	A	C	G	T	C	A	C	G	G	G	G
	1551	1890	2061	2076	2209	2589	2640	3147	3403	3495	3705	3813	3972	4056	4200	4236
MT008453.1	A	T	C	G	C	T	T	G	C	C	G	G	G	C	A	G
ZD	G	C	T	A	T	C	C	A	T	T	A	A	A	T	G	A
												ORF2
	4299	4347	4518	4687	4758	4779	5073	5133	5187	5308	5350	5635	5731	5761	5872	5995
MT008453.1	T	C	G	T	T	A	C	T	G	G	T	T	G	C	T	T
ZD	C	T	A	G	C	G	T	C	A	A	C	C	A	T	G	C
												ORF3
	6235	6246	6452	6484	6595	6715	6819	6833	6837	6888	6933	6941	7200	7260	7296	7383
MT008453.1	G	C	T	T	C	T	T	C	C	T	G	G	A	T	C	C
ZD	A	T	C	C	T	C	C	T	T	C	A	A	G	C	T	T
